# Supplementary material
Source: PubMed Central journal article supplement (PMC3067268)
Supplement: supp_77_5_1844__1.pdf [file supp_77_5_1844__1.pdf]

SUPPLEMENTAL FIGURE 1. Protein alignment of FoxC, CbsA and the cytochrome *b* subunit of the ethylbenzene dehydrogenase from *Azoarcus* sp. EbN1. The conserved lysine (K484 from Figure 5 alignment) is indicated by an arrow. Stokoda- (*S. tokodaii*), Ssof- (*S. solfataricus*), Sacido- (*S. acidocaldarius*), Msedul- (*M. sedula*), Silan- (*S. islandicus*), Apernnitra (*Aeropyrum pernix* nitrate reductase), MK1- (Strain MK1), EBDH (*Azoarcus* sp. EbN1 EBDH gamma subunit), Cmagu- (*C. maquilingensis*), Smetal- (*S. metallicus*). Dark shaded amino acids are based on a shade threshold of 85%.

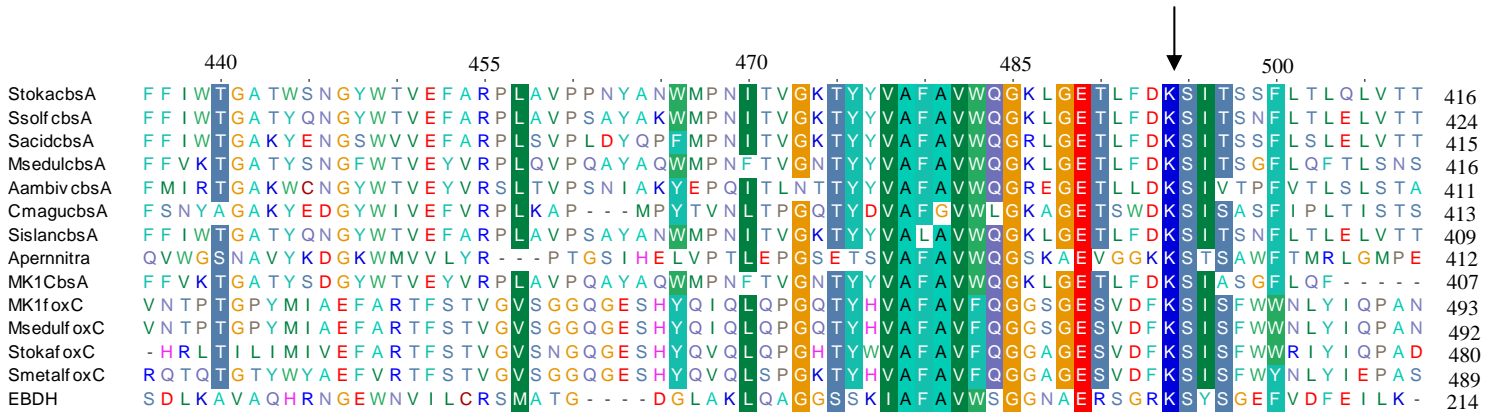

SUPPLEMENTAL FIGURE 2. Alignment of homologous sequences to the *Azoarcus* sp. EbN1 gamma EBDH Lys-Met axially coordinated heme B (alignment id: AzoarEBDH) which include: the EBDH from *Hydrogenivirga* sp. 128-5-R1-1 (HydroEBDH); nitrate reductases from *Aeropyrum pernix* (Apernit) and *Pyrobaculum calidifontis* (Pcalnit); selenate reductase from *Thauera selenatis* (Selenate); DMSO reductase heme B subunit from *Halorubrum lacusprofundi* (HlacDMSOhem) and *Halorhabdus utahensis* (HutaDMSOhem); and hypothetical cytochromes from *Sulfurihydrogenibium yellowstonense* (Syellowst). The conserved methionine and lysine responsible for heme B coordination are indicated with arrows.

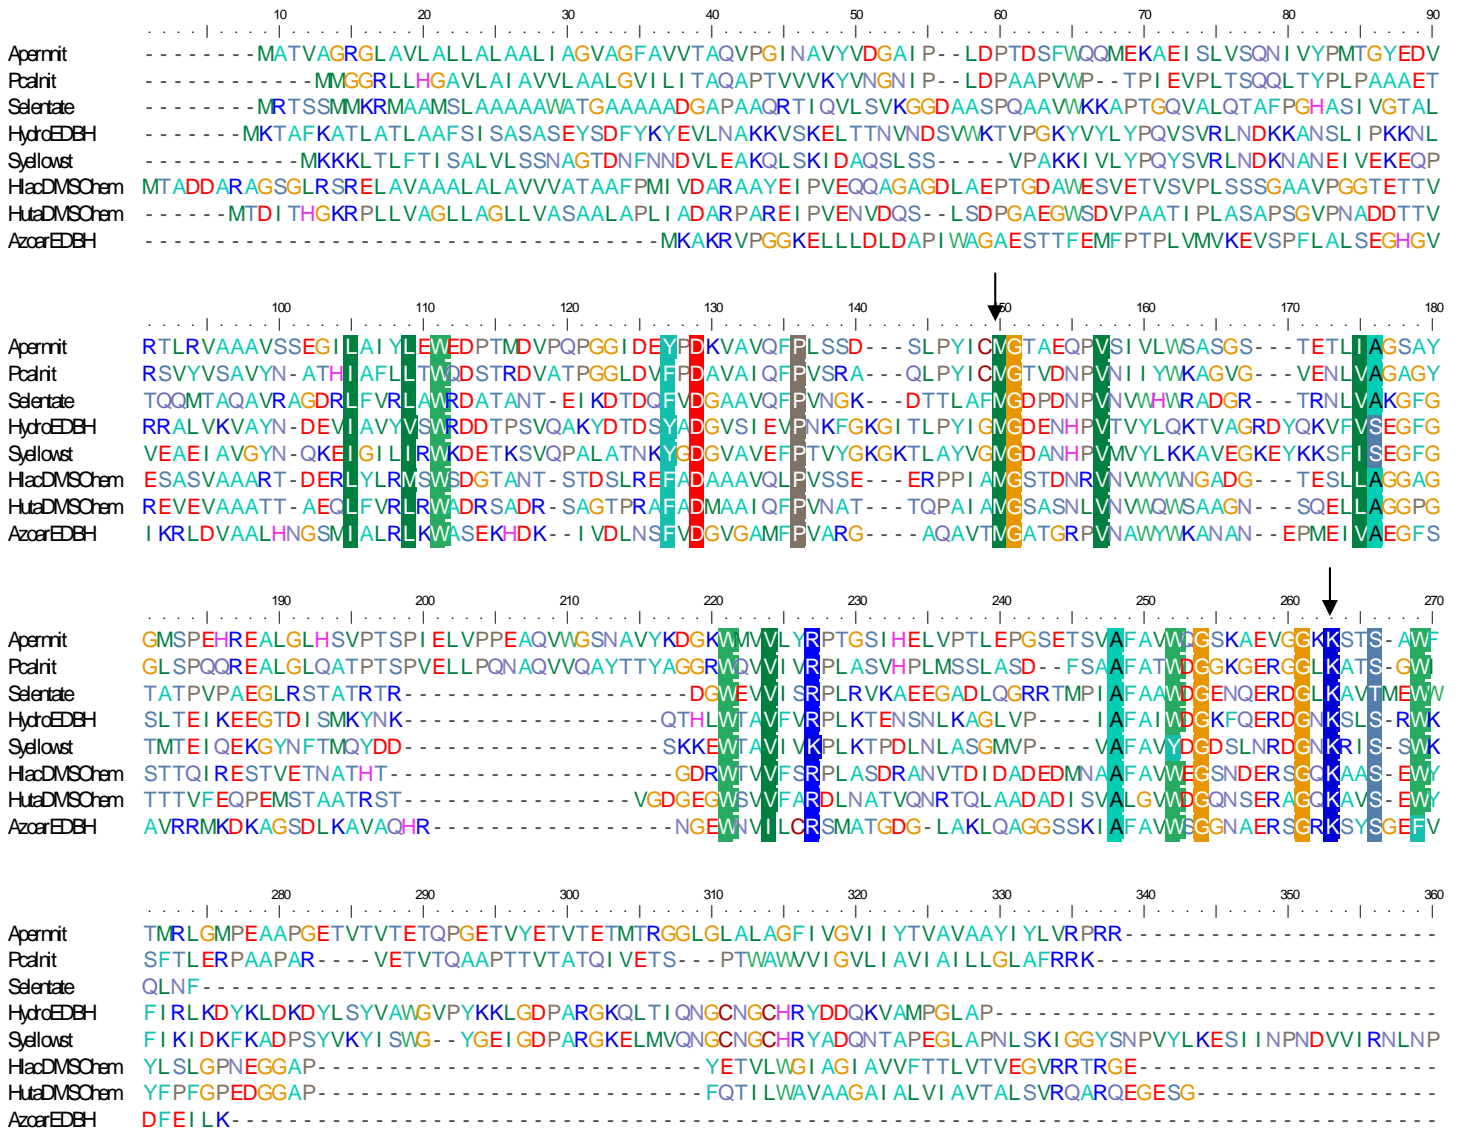

SUPPLEMENTAL TABLE 1. Primers utilized in this study with melting temperatures and product length (bp).

| <b>Primer ID</b> | <b>Sequence 5'-3'</b>   | <b>Melting Temp</b> | <b>Product length</b> |
|------------------|-------------------------|---------------------|-----------------------|
| SoxBF            | TGGGGCGCTCTACTACTATG    | 58.0                |                       |
| SoxBR            | TGTTAGACCTGAACCCGAAG    | 57.8                | 202                   |
| SoxMF            | CTTCGGTCCCATAAACTG      | 58.1                |                       |
| SoxMR            | CCAAGTGAAGAGCGACATCT    | 58.0                | 202                   |
| FoxAF            | CCAGGACGAAGAGTACTGGA    | 57.9                |                       |
| FoxAR            | GTGGGCTCAACATCTACCTG    | 58.2                | 201                   |
| FoxCF            | GGAGTAGCCTATGGTGCTGA    | 57.9                |                       |
| FoxCR            | CACTGTTGTGTGCCCTGATA    | 58.1                | 202                   |
| FoxGF            | CCTGTCCACACGACAACATA    | 58.0                |                       |
| FoxGR            | GGTACCAGCAACTTGGAGAA    | 57.8                | 217                   |
| DoxB2F           | GGCATGCTAGGCGTAATAGA    | 58.0                |                       |
| DoxB2R           | CCACTTTGCTCTAGGTTCCA    | 58.0                | 213                   |
| DoxBF            | AAACCGAACAGATCCCTTTC    | 58.1                |                       |
| DoxBR            | TTTGTGACAGCTTTGTTCCA    | 57.9                | 218                   |
| SoxE1F           | ACCTGCAGGCTACAGCATAG    | 58.2                |                       |
| SoxE1R           | ACTTCAGTGGCTGACTGACC    | 57.8                | 198                   |
| SoxE2F           | TATCCATTGGCGGATGTAAC    | 58.3                |                       |
| SoxE2R           | AACTCAACACCACCAAACC     | 58.3                | 212                   |
| TqodF            | CTCTCAGTTTCGCTGTAGGA    | 58.2                |                       |
| TqodR            | GTAAGGAACGCTACGTCCAA    | 57.9                | 196                   |
| McoF             | TGCAGGCTGGTACATAAACA    | 57.8                |                       |
| McoR             | AAGGACTTCCGAACCTCTGGT   | 57.8                | 212                   |
| 16SF             | CCGTAAAGTCACCGTTTAAAGAC | 59.2                |                       |
| 16SR             | GTATCTAATCCCTTTTGCTACCC | 57.4                | 206                   |
| SoxBF            | TTACCTATCCCGCAAACAGC    | 55.1                |                       |
| SoxBR            | TACACCACTGGGTGACCGTA    | 57.7                | 580                   |

|        |                          |      |     |
|--------|--------------------------|------|-----|
| SoxMF  | CACCTTTCTTCGGTCCCATA     | 54.2 |     |
| SoxMR  | GCTATCTCTCTGGCCACGTC     | 57.3 | 565 |
|        |                          |      |     |
| DoxBF  | GCCATGTAAACCACAGCGTG     | 57.0 |     |
| DoxBR  | GGTCTCAGGCGTACTTGTGT     | 56.9 | 600 |
|        |                          |      |     |
| DoxB2F | CATCAGTGCGGCTATCCTAGC    | 57.6 |     |
| DoxB2R | TCCTCCAGTTTCATACTCACCTCC | 57.8 | 700 |
|        |                          |      |     |
| FoxAF  | CTGGCCAACATATCCGTCTT     | 54.8 |     |
| FoxAR  | CCGAATATCCAGCCTGTGTT     | 54.8 | 550 |
|        |                          |      |     |
| FoxBF  | GAAGAACAGAGCTATTACAGTACC | 52.7 |     |
| FoxBR  | GGTACTGTAATAGCTCTGTTCTTC | 52.7 | 520 |
|        |                          |      |     |
| FoxCF  | ATCCTAATGAAGGCCCCAGT     | 55.8 |     |
| FoxCR  | GGGGAGTGTAGGCAACTTGA     | 56.8 | 566 |
|        |                          |      |     |
| FoxDF  | TGTTTCTTTAGTCTACGTTTTTCG | 51.1 |     |
| FoxDR  | TGTCTTTTTTGTACTCTAACATCG | 51.2 | 750 |
|        |                          |      |     |
| FoxEF  | CCTGGCCATGGTGCTGGTGAC    | 63.3 |     |
| FoxER  | TGGCAGGAGTTAAGTTCTCAAGG  | 56.7 | 520 |
|        |                          |      |     |
| FoxGF  | GAGTGGGTGCACAGACTTCA     | 57.2 |     |
| FoxGR  | AATAGGACGACACCGGTCAG     | 56.5 | 600 |
|        |                          |      |     |
| FoxJF  | GGAAGATATTAACGCCAGTAAGGA | 54.3 |     |
| FoxJR  | TGTAGGATGGACCCTCATAATGC  | 56.3 | 710 |
|        |                          |      |     |
| SoxE1F | GACGGTGCAGATAACACTGG     | 55.7 |     |
| SoxE1R | CCACATTCCAGACTCAGCG      | 55.8 | 350 |
|        |                          |      |     |
| SoxE2F | CGAGAATCCAGTCGGGATGT     | 55.6 |     |
| SoxE2R | CAGCTGAGTCACAAGACTTCC    | 55.4 | 450 |
|        |                          |      |     |
| TqodF  | CCTCTCAGGTTGCTGTAGG      | 57.0 |     |
| TqodR  | CCAGTAGGCTGGAGCGAAGC     | 60.5 | 250 |
|        |                          |      |     |
| McoF   | CGCCTGGATTAATGAAAGTGA    | 52.9 |     |
| McoR   | TTCCTGCCATCCCCATATTA     | 53.2 | 584 |
|        |                          |      |     |
| RcbfF  | ATCCCAGCTGGATGTAAACG     | 54.8 |     |
| RcbfR  | GGCCACATTTACATGGCTTT     | 53.9 | 460 |
|        |                          |      |     |
| CbsAF  | GGTCGCAGCTCTCGTAATGG     | 58.0 |     |
| CbsAR  | CCACTCGCGGGAGGATACAAC    | 59.9 | 300 |
